# Supplementary material
Source: PubMed Central journal article supplement (PMC7889766)
Supplement: NIHMS1622809-supplement-3.pdf [file NIHMS1622809-supplement-3.pdf]

# PICU CLABSI Survey

Please complete the survey below.

Thank you!

**The purpose of the survey is to explore behaviors that impact central-line associated bloodstream infection (CLABSI) prevention in the pediatric intensive care unit (PICU). Thank you for taking the time to complete.**

**"For this whole survey, the term "CLABSI bundles" refers to the MAINTENANCE bundle (not the insertion bundle), the groups of tasks you perform as a PICU bedside RN to prevent CLABSI.**

**Questions on "bundles" in general refers to the groups of tasks you perform as a PICU nurse to prevent other types of harm, like peripheral IV infiltrates (PIVI), hospital acquired pressure injury (HAPI), ventilator associated pneumonia/event (VAP/E), catheter-associated urinary tract infection (CAUTI), and venous thromboembolism (VTE). For example, assessing a PIV each hour, changing a central line dressing and tubing labels, providing oral care for intubated patients, etc.**

## **Topic 1: Knowledge and decisions about the CLABSI bundle**

In general, during a shift, keeping track of when a patient's cap changes, tubing/line changes, CHG bath, and dressing changes are due is:

- Very easy
- Fairly easy
- Not easy, but manageable
- Difficult
- Extremely difficult

In the last 6 months of PICU shifts, how often have you been unsure how to complete an element or elements of the CLABSI bundle?

- Very often
- Fairly often
- 1 or 2 times
- Never
- I cannot answer because I am not sure what the elements of the CLABSI bundle are

In the last 6 months of PICU shifts, how often have you forgotten to complete an element(s) of the CLABSI bundle?

- Very often
- Fairly often
- 1 or 2 times
- Never
- I cannot answer because I am not sure what the elements of the CLABSI bundle are

---

There are several individual tasks in the CLABSI prevention maintenance bundles we use in the PICU. Select the item or items that are TRUE (can select more than one):

- Necessity of the central line should be discussed every 24 hours
- Cap changes should be performed every 7 days
- Lipid tubing should be changed every 4 days
- Prior to line access, the hub should be scrubbed for 15 seconds and allowed to dry for 30 seconds
- A chlorhexidine bath should be completed every 24 hours

---

Which of the following are possible outcomes for a patient who develops a CLABSI (central line associated bloodstream infection) while in the PICU? Select all that apply

- Higher chance of death during their acute illness (increased mortality)
- Not recovering to their pre-illness baseline level of function (increased morbidity)
- Increased risk of needing a blood transfusion
- Increased risk of needing TPN/not being able to tolerate enteral nutrition
- Longer hospital stay
- More expensive hospital stay

---

When you have a central line question/concern/problem, the resource you use the MOST OFTEN is: (select one)

- VAS (vascular access) team
- PICU VAS Lead
- PICU safety/quality champions
- PICU charge nurses and/or CRN
- PICU CLABSI prevention team (nurse or MD team members)
- Physician/medical team
- Infection control

---

When you have a central line question/concern/problem, the resource you use the LEAST OFTEN is: (select one)

- VAS (vascular access) team
- PICU VAS Lead
- PICU safety/quality champions
- PICU charge nurses and/or CRN
- PICU CLABSI prevention team (nurse or MD team members)
- Physician/medical team
- Infection control

---

## Topic 2: The experience of performing CLABSI bundle/harm prevention bundle tasks

During your most recent PICU shift, how easy or difficult was it to complete all of the CLABSI bundle tasks (meaning to achieve 100% compliance across every part of the bundle within the standards of the PICU)? (Select one)

- Very easy
- Easy
- Not easy, but manageable
- Difficult
- Impossible
- I am not sure what my CLABSI bundle compliance was on my last shift

---

Which component of the CLABSI bundle is the most difficult to complete perfectly (100% compliant) every shift?  
(Select one)

- Dressing change
- Cap changes
- Tubing/line changes
- CHG bath
- Daily discussion of line necessity with provider team
- They are all equally easy or equally difficult to complete

---

Why is that component of CLABSI the most difficult to complete?

---

Finding/gathering/obtaining the supplies I need to perform the CLABSI bundle elements is: (Select one)

- Very easy
- Fairly easy
- Not easy, but manageable
- Difficult
- Extremely difficult

---

Getting the help I need to perform the CLABSI bundle elements to 100% compliant standards is: (select one)

- Very easy
- Fairly easy
- Not easy, but manageable
- Difficult
- Impossible
- I do not need help

---

In the last 6 months during a PICU shift, have the clinical care demands of your patient prevented you from performing the required CLABSI bundle tasks as well as you wanted to? (select one)

- Yes, during most of my shifts
- Yes, during some of my shifts
- Yes, during 1 or 2 of my shifts
- No, never

---

In the last 6 months during a PICU shift, have the clinical care demands of your patient prevented you from performing ANY of the required bundle tasks as well as you wanted to? (not specific to CLABSI) (select one)

- Yes, during most of my shifts
- Yes, during some of my shifts
- Yes, during 1 or 2 of my shifts
- No, never

---

In your typical shift, which bundle takes the most time to complete?

- CLABSI
- PIVI
- VAP/E
- CAUTI
- VTE
- They all require about the same amount of time

---

In your typical shift, which bundle is most difficult to complete?

- CLABSI
- PIVI
- VAP/E
- CAUTI
- VTE
- They are all equally difficult/easy

---

Why is the chosen bundle most difficult to complete?

---

Your patient "Susie's" CHG bath is due in 1 hour to be completed on time, but you are tied up with your other assigned patient "Jacob" helping with chest tube placement and then an urgent trip to MRI and know you will not be done for several hours. How do you address the CHG bath completion for Susie?

- Perform the bath when you return, no matter how long that takes
- Perform the bath now, asking someone else to step in during Jacob's procedures
- Ask a colleague to perform the bath for you so it can be completed on time; they are likely to say "yes" and get the bath done
- Ask a colleague to perform the bath for you so it can be completed on time; they are likely to say "no" and are not able to do the bath for you
- Other

---

Describe:

---

---

Of the following, what would help you the MOST to more consistently achieve 100% compliance with the CLABSI bundle? (Select ONE)

- Lower census in the unit/fewer patients overall
- Automated reminders in the electronic medical record when certain elements of the bundle are due
- More help from nursing colleagues or charge RN/ CRNs
- More help from medical team/providers
- Feedback letting you know when you miss 100% compliance
- Other

---

Describe:

---

---

### Topic 3: Your opinion about bundle tasks for harm prevention

Thinking about just the CLABSI bundle and the goal of 100% compliance, how much of a stressor are these tasks for you in a typical PICU shift?

- Extremely stressful
- Somewhat stressful
- A little bit stressful
- Not stressful

---

Thinking about all the harm-prevention bundles in the PICU (CLABSI, CAUTI, VAP/E, PIVI, VTE, and HAPI) and the goal of 100% compliance, how much of a stressor are these tasks for you in a typical PICU shift?

- Extremely stressful
- Somewhat stressful
- A little bit stressful
- Not stressful

---

A typical PICU shift for a bedside RN has many tasks that must be accomplished in a timely and correct manner (medication administration, physical exam assessments, communicating patient status changes to other team members, rounds, transfers/admissions, etc) in a busy and high-stress environment. Considering all your responsibilities during a shift, how would you rate the importance of performing/complying with the required CLABSI bundle tasks?

- The most important part of my job
- A very important part of my job
- Important, but not more important than any other part of my job
- Not a very important part of my job
- The least important part of my job

---

In the last 6 months during a PICU shift, has performing the required CLABSI bundle tasks prevented you from doing another important task for your patient as well as you wanted to? Select one.

- Yes, during most of my shifts
- Yes, during some of my shifts
- Yes, during a few of my shifts
- No, never

---

In the last 6 months during a PICU shift, has performing any of the required harm-prevention bundle tasks (CLABSI, CAUTI, VAP/E, PIVI, VTE, HAPI) prevented you from doing another important task for your patient as well as you wanted to? Select one.

- Yes, during most of my shifts
- Yes, during some of my shifts
- Yes, during a few of my shifts
- No, never

---

Is your personal motivation for completing the CLABSI bundle tasks impacted when the medical team is highly motivated to prevent CLABSI's?

- Yes, a great deal
- Yes, a little bit
- No

---

Is your personal motivation for completing the CLABSI bundle tasks impacted when the attending physician is highly motivated to prevent CLABSI's?

- Yes, a great deal
- Yes, a little bit
- No

---

How important do you think harm prevention bundles like CLABSI are to patients' parents or family members?

- Extremely important
- Very important
- Important
- Not very important
- Not at all important

---

How important is your ability to complete the CLABSI bundle tasks to the hospital leadership?

- Extremely important
- Very important
- Important
- Not very important
- Not at all important

---

How much real-time, in-unit support do you receive to successfully complete the CLABSI bundle?

- A great deal of support
- A significant amount of support
- A fair amount of support
- Very little support
- No support
- I do not need support to successfully complete the CLABSI bundle

---

**Demographics: Please give one response for each question**

Your age in years

---

Gender.

- Female
- Male
- Other

---

Years working as a PICU nurse at CHOP.

- Less than 1
- 1-3
- 4-5
- 5-10
- Greater than 10

---

Have you worked as a PICU nurse in hospitals other than CHOP?

- Yes
- No

---

Years working as a PICU nurse outside of CHOP.

- Less than 1
- 1-3
- 4-5
- 5-10
- Greater than 10

---

Have you ever have been, or are you currently on, a CHOP harm-prevention team (such as the CLABSI working group, the PIV infiltrate team, the CAUTI rounding team, etc)?

- Yes
- No

---

Have you ever taken care of a patient with a CLABSI?

- Yes
- No

---

Have you ever received feedback that you needed to improve your personal bundle compliance performance?

- Yes
- No

---

Your typical work schedule is:

- Day shifts only
- Mix of days and nights
- Night shifts only
